# Supplementary figures and images for: Establishment of a Simple, Reproducible, and Long-lasting Hind Limb Animal Model of Lymphedema
Source: PubMed Central journal article supplement — Plast Reconstr Surg Glob Open. 2023 Sep 7;11(9):e5243. doi: 10.1097/GOX.0000000000005243 (PMC10484367; doi:10.1097/gox.0000000000005243), 2023-09-07

Figure, Supplementary Digital Content 1

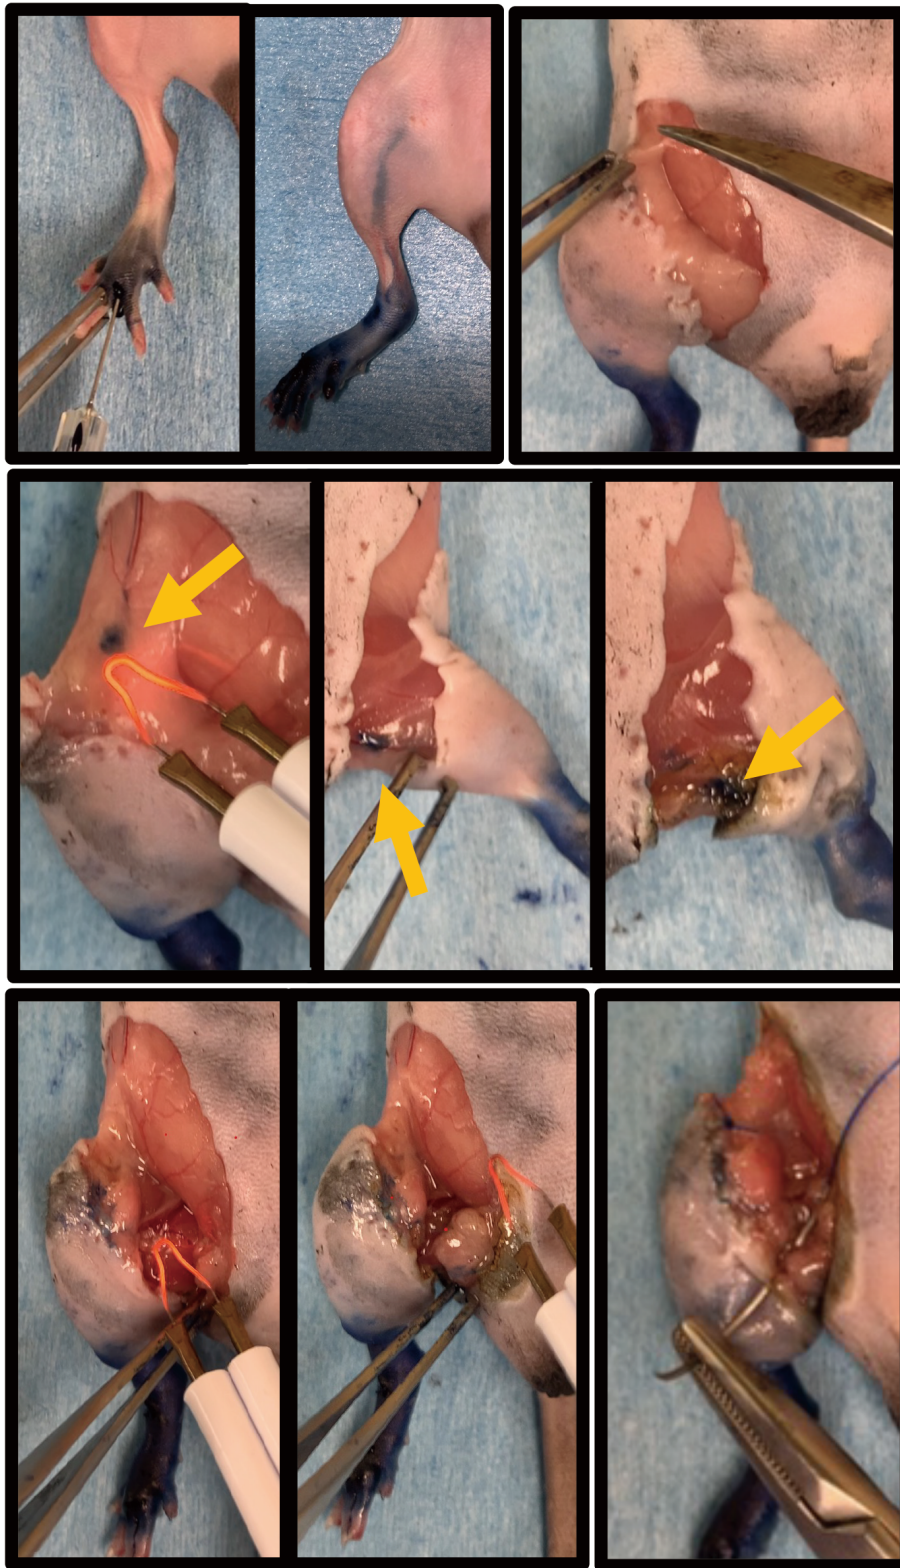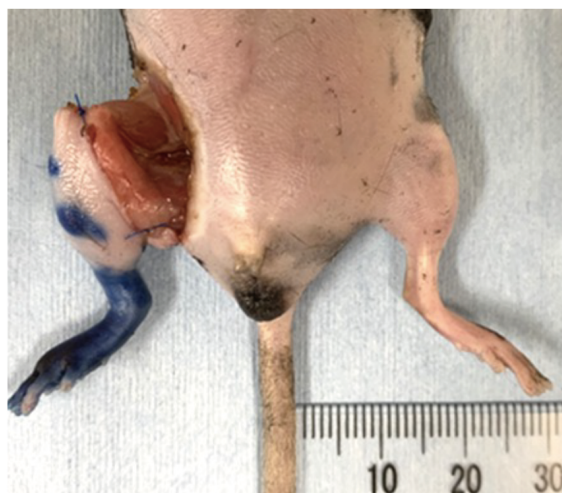

Supplement: gox-11-e5243-s001.pdf [file gox-11-e5243-s001.pdf]

Figure, Supplementary Digital Content 2

● lymph node

**Model A**

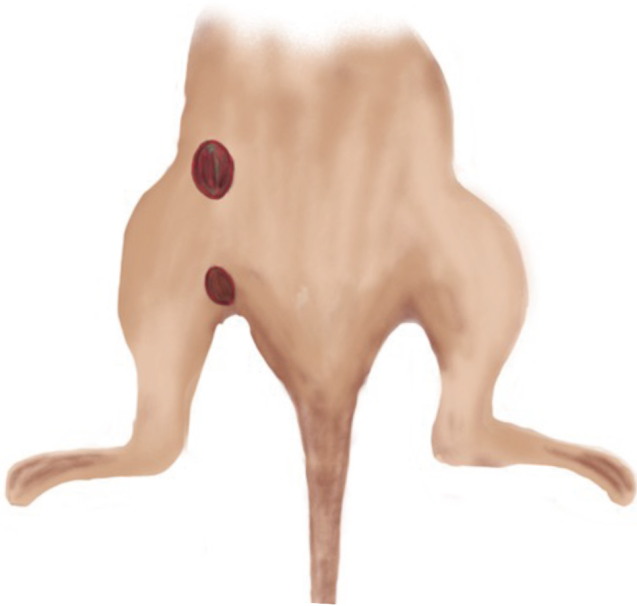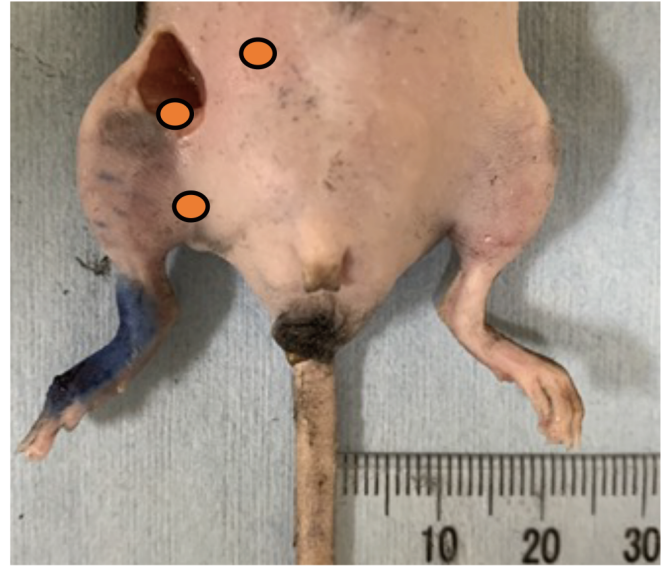

**Model B**

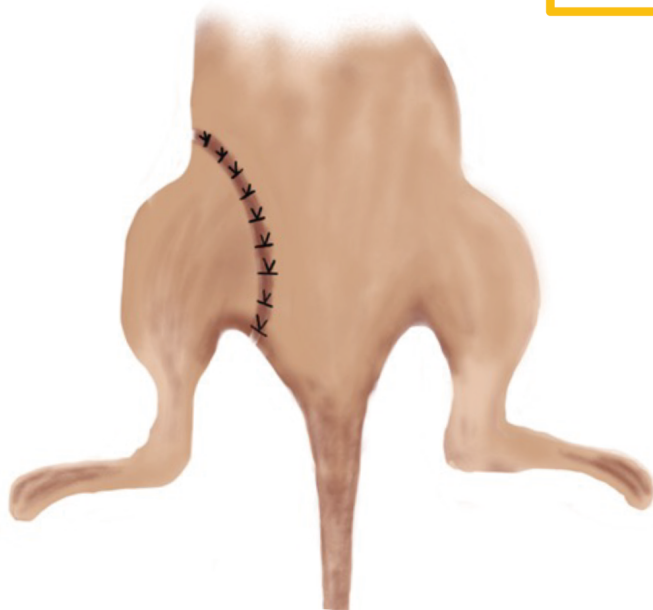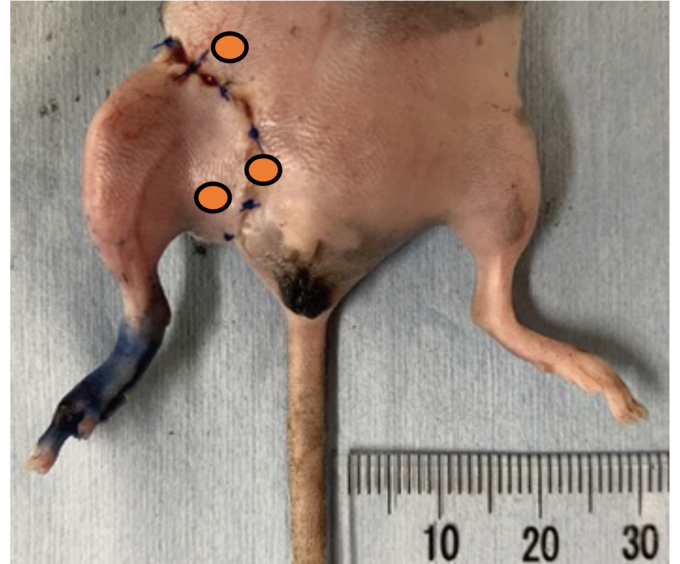

Supplement: gox-11-e5243-s002.pdf [file gox-11-e5243-s002.pdf]

Figure, Supplementary Digital Content 3

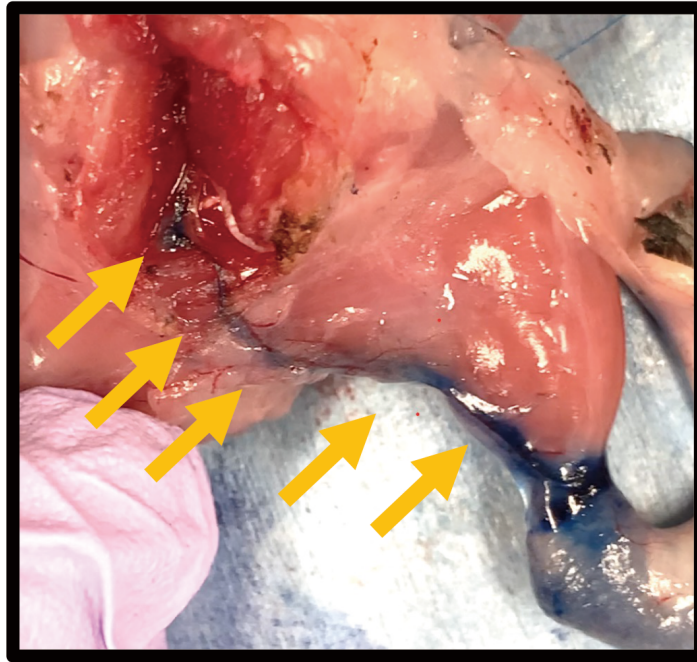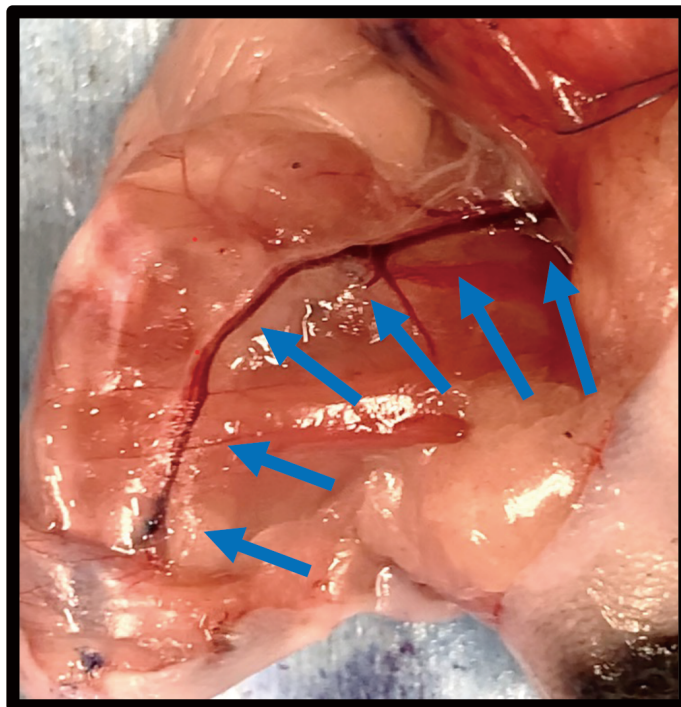

Supplement: gox-11-e5243-s003.pdf [file gox-11-e5243-s003.pdf]

# Figure, Supplementary Digital Content 4

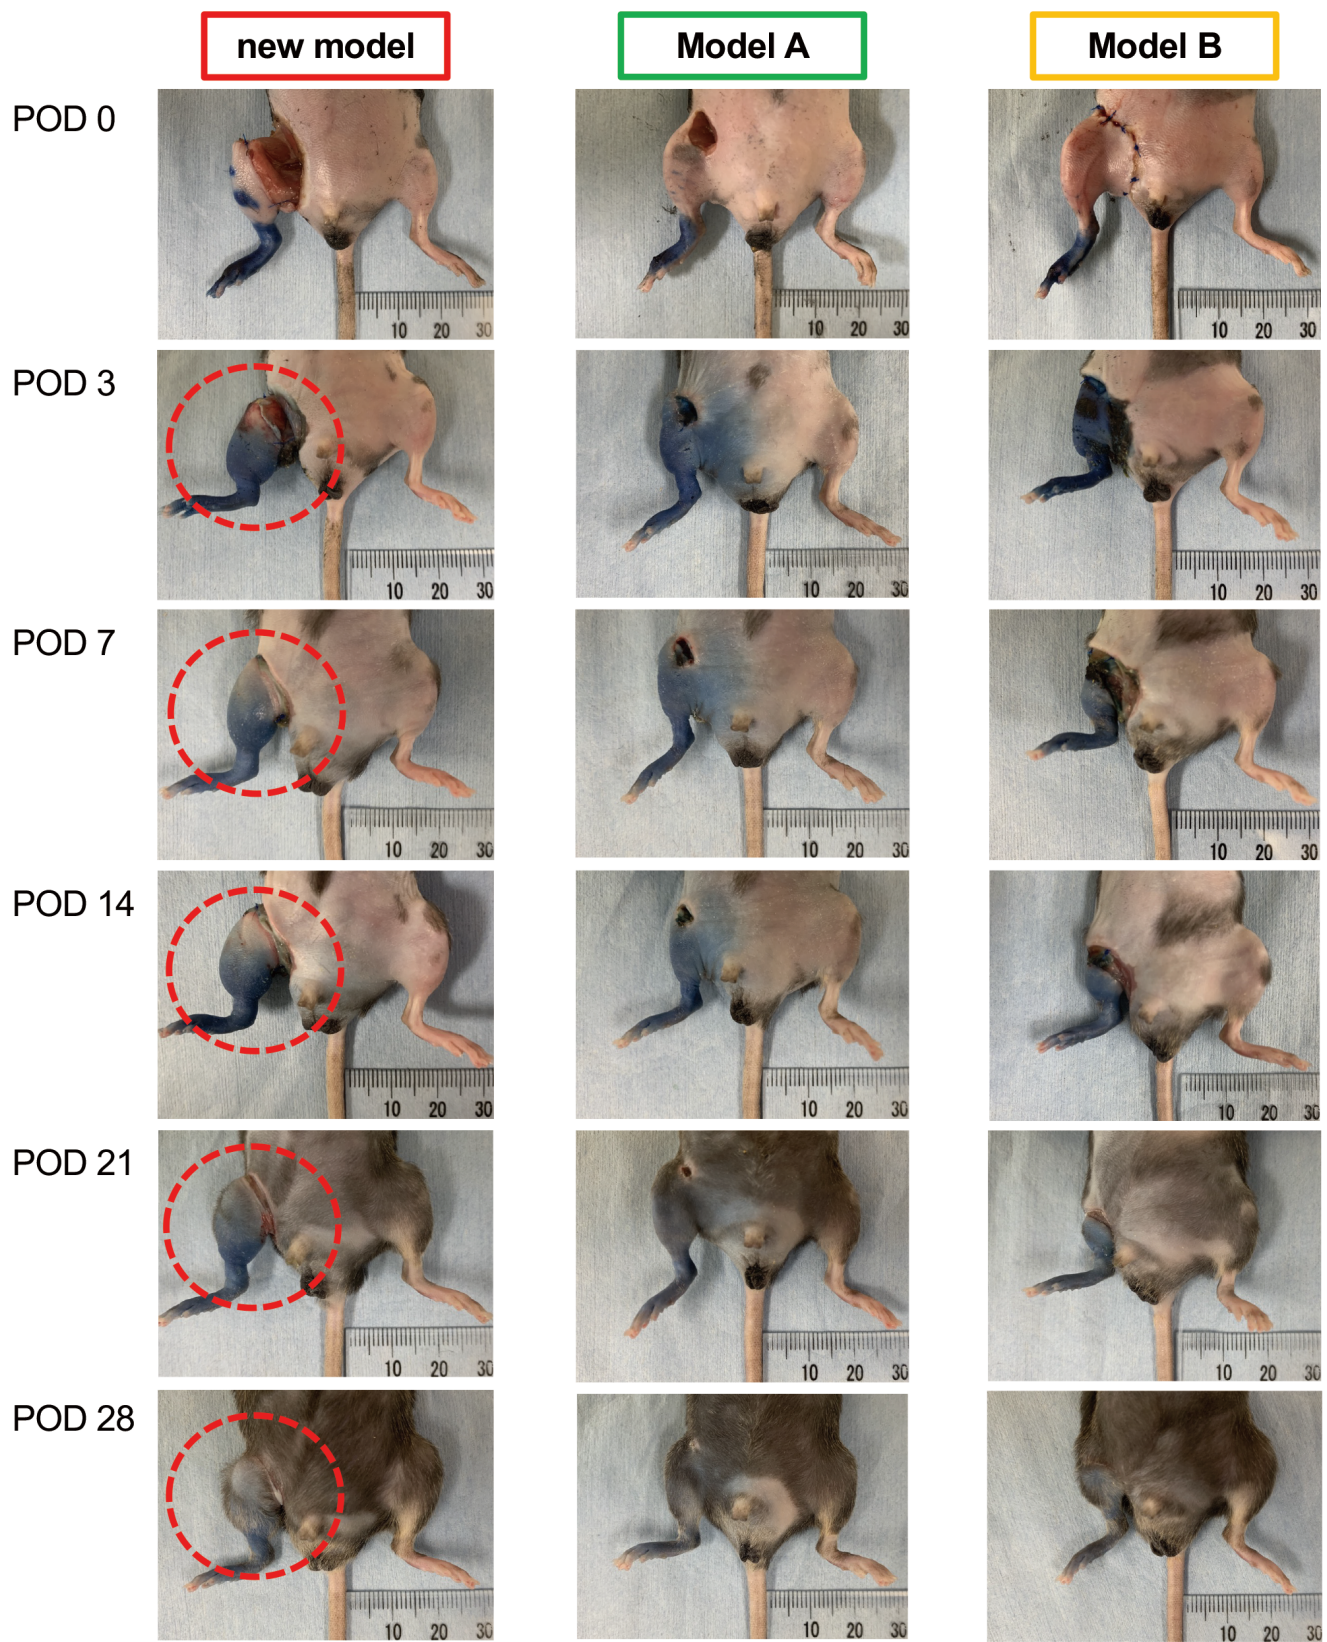

Supplement: gox-11-e5243-s004.pdf [file gox-11-e5243-s004.pdf]

Figure, Supplementary Digital Content 6

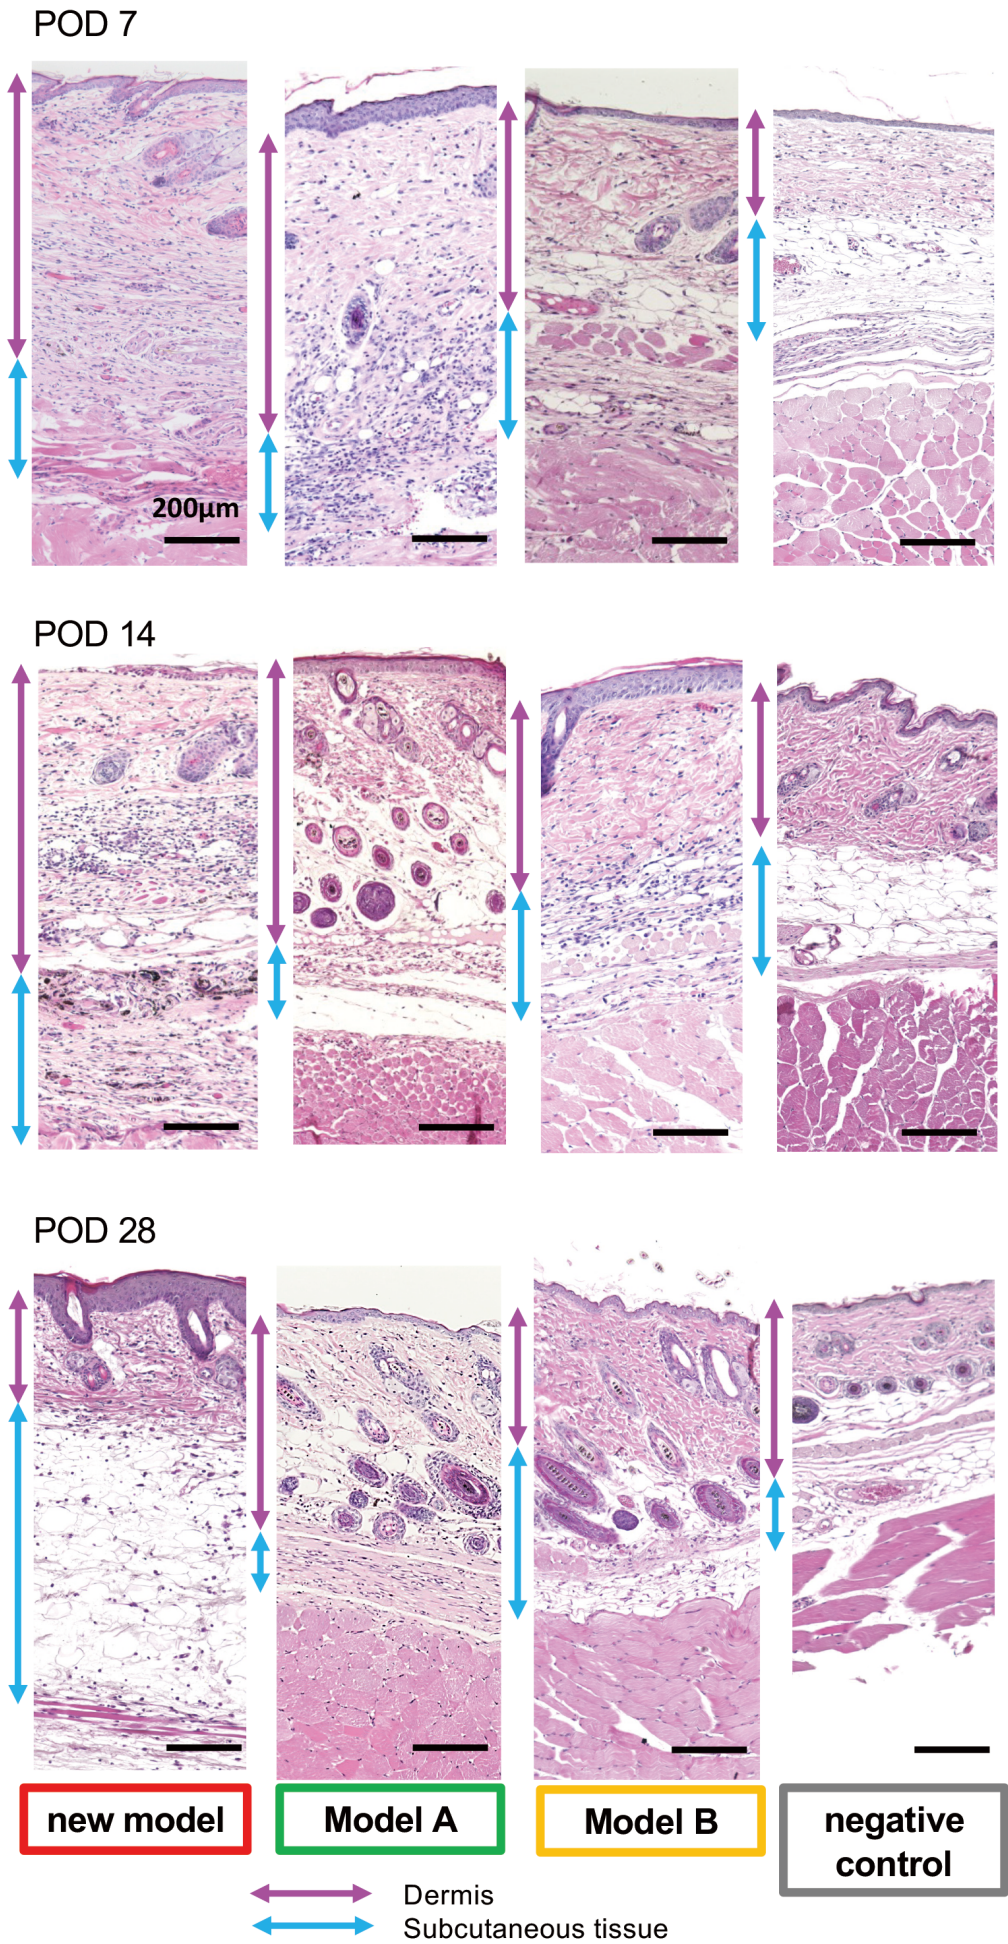

Supplement: gox-11-e5243-s006.pdf [file gox-11-e5243-s006.pdf]
